# Supplementary material for: Effectiveness of integrative medicine group visits in chronic pain and depressive symptoms: A randomized controlled trial
Source: PubMed Central journal article supplement (PMC6919581; doi:10.1371/journal.pone.0225540), 2019-12-18
Supplement: pone.0225540.s001.pdf [file pone.0225540.s001.pdf]

**Table 6: Exploratory attendance analysis - Demographic data organized by number of group visit sessions attended and control group PCP visit at relevant time points (n, %)**

| Variable         | Attended 4 or less sessions (N= 18) | Attended 5-6 sessions (N=22) | Attended 7 or more sessions (N=36) | Attended at least 1 PCP visit (N=62) | Did not attend any PCP visit (N=17) |
|------------------|-------------------------------------|------------------------------|------------------------------------|--------------------------------------|-------------------------------------|
| Age (22-84)*     | 41 (10.14)                          | 47(10.85)                    | 55 (11.86)                         | 54 (11.66)                           | 42 (10.44)                          |
| Gender           | N (%)                               | N (%)                        | N (%)                              | N (%)                                | N (%)                               |
| Female           | 12 (92)                             | 17 (77)                      | 30 (83)                            | 54 (87)                              | 16 (94)                             |
| Race             |                                     |                              |                                    |                                      |                                     |
| White            | 1 (8)                               | 4 (18)                       | 5 (14)                             | 12 (19)                              | 5 (29)                              |
| Black            | 9 (69)                              | 11 (50)                      | 23 (64)                            | 37 (60)                              | 8 (47)                              |
| Other            | 3 (23)                              | 7 (32)                       | 8 (22)                             | 13 (21)                              | 4 (24)                              |
| Ethnicity        |                                     |                              |                                    |                                      |                                     |
| Hispanic         | 3 (23)                              | 1(5)                         | 6 (17)                             | 5 (8)                                | 7 (41)                              |
| Non-Hispanic     | 10 (77)                             | 21(95)                       | 30 (83)                            | 57 (92)                              | 10 (59)                             |
| Income           |                                     |                              |                                    |                                      |                                     |
| < than \$5K      | 2 (15)                              | 1 (5)                        | 5 (14)                             | 8 (13)                               | 3 (18)                              |
| \$5K-\$29.99K    | 7 (54)                              | 11 (50)                      | 16 (45)                            | 34 (55)                              | 7 (41)                              |
| \$30K and over   | 1 (8)                               | 2 (9)                        | 3 (8)                              | 6 (10)                               | 1 (6)                               |
| Refuse/None      | 3 (23)                              | 8 (36)                       | 12 (33)                            | 14 (22)                              | 6 (35)                              |
| Work Status      |                                     |                              |                                    |                                      |                                     |
| Full/Part time   | 3 (23)                              | 3 (14)                       | 8 (22)                             | 11 (18)                              | 6 (35)                              |
| Unemployed       | 2 (15)                              | 2 (9)                        | 5 (14)                             | 9 (14)                               | 3 (18)                              |
| Retired          | 1 (8)                               | 0 (0)                        | 8 (22)                             | 7 (11)                               | 2 (12)                              |
| Leave/Disability | 5 (39)                              | 13 (59)                      | 11 (31)                            | 29 (47)                              | 5 (29)                              |
| Other            | 2 (15)                              | 4 (18)                       | 4 (11)                             | 6 (10)                               | 1 (6)                               |
| Education Level  |                                     |                              |                                    |                                      |                                     |
| < high school    | 2 (15)                              | 5 (23)                       | 5 (14)                             | 6 (10)                               | 6 (35)                              |
| HS degree        | 5 (38)                              | 6 (27)                       | 11 (30)                            | 26 (42)                              | 5 (29)                              |
| Some college     | 5 (38)                              | 8 (36)                       | 15 (42)                            | 20 (32)                              | 3 (18)                              |
| College          | 1 (8)                               | 3 (14)                       | 5 (14)                             | 10 (16)                              | 3 (18)                              |

\*Age is summarized with mean (standard deviation)

**Table 7: Descriptive Data for Exploratory Dose Analysis Outcomes for Specific Aims****Outcomes**

| Variable                       | Total<br>N=155   | Intervention                                 |                                       |                                              | Control                                       |                                          |
|--------------------------------|------------------|----------------------------------------------|---------------------------------------|----------------------------------------------|-----------------------------------------------|------------------------------------------|
|                                |                  | Attended<br>4 or less<br>sessions<br>(N= 18) | Attended<br>5-6<br>sessions<br>(N=22) | Attended<br>7 or more<br>sessions<br>(N=36)) | Attended<br>at least 1<br>PCP Appt.<br>(N=62) | Not attend<br>any PCP<br>Appt.<br>(N=17) |
| Baseline Average pain*         | 6.99 (1.90)      | 7.38<br>(2.10)                               | 6.64<br>(1.99)                        | 6.89<br>(1.83)                               | 6.98<br>(1.89)                                | 7.00<br>(1.97)                           |
| 9 weeks (Wk) Average pain*     | 6.21 (2.15)      | 7.00<br>(2.45)                               | 6.00<br>(2.31)                        | 6.28<br>(2.20)                               | 6.27<br>(2.07)                                | 5.46<br>(1.85)                           |
| 21 Wk Average pain*            | 6.26 (1.97)      | 6.45<br>(2.16)                               | 5.76<br>(2.02)                        | 6.34<br>(1.89)                               | 6.15<br>(2.05)                                | 7.15<br>(1.46)                           |
| Baseline PHQ-9*                | 12.12<br>(5.47)  | 14.23<br>(4.40)                              | 12.82<br>(4.85)                       | 11.83<br>(6.27)                              | 11.18<br>(5.44)                               | 12.29<br>(4.78)                          |
| 9 Wk PHQ-9*                    | 10.32<br>(5.63)  | 14.55<br>(3.33)                              | 9.77<br>(4.98)                        | 10.69<br>(5.98)                              | 8.95<br>(5.68)                                | 12.54<br>(5.08)                          |
| 21 Wk PHQ-9*                   | 9.71 (5.66)      | 11.82<br>(5.34)                              | 8.05<br>(5.57)                        | 9.14<br>(5.23)                               | 9.73<br>(5.91)                                | 12.08<br>(5.51)                          |
| Baseline Pain Self Efficacy*   | 30.94<br>(14.41) | 32.77<br>(15.18)                             | 28.27<br>(16.43)                      | 30.08<br>(15.48)                             | 32.31<br>(13.93)                              | 29.76<br>(11.87)                         |
| 9 Wk Pain Self Efficacy*       | 35.30<br>(14.85) | 30.91<br>(15.35)                             | 38.86<br>(14.27)                      | 35.47<br>(16.58)                             | 35.16<br>(14.68)                              | 33.08<br>(11.37)                         |
| 21 Wk Pain Self Efficacy*      | 36.00<br>(14.21) | 31.00<br>(13.34)                             | 35.05<br>(13.31)                      | 34.03<br>(16.24)                             | 37.95<br>(13.45)                              | 38.23<br>(14.12)                         |
|                                | N (%)            | N (%)                                        | N (%)                                 | N (%)                                        | N (%)                                         | N (%)                                    |
| Baseline Pain Medication use   | 132 (85)         | 13 (100)                                     | 19 (86)                               | 31 (86)                                      | 52 (84)                                       | 13 (76)                                  |
| 9 Wk Pain Medication use       | 107 (78)         | 8 (73)                                       | 19 (86)                               | 26 (72)                                      | 43 (77)                                       | 11 (85)                                  |
|                                | N (%)            | N (%)                                        | N (%)                                 | N (%)                                        | N (%)                                         | N (%)                                    |
| 21 Wk Pain Medication use      | 108 (78)         | 9 (82)                                       | 14 (67)                               | 25 (71)                                      | 50 (85)                                       | 10 (77)                                  |
| Baseline NSAID use             | 74 (48)          | 7 (54)                                       | 11 (50)                               | 19 (53)                                      | 33(49)                                        | 4 (24)                                   |
| 9 Wk NSAID use                 | 66 (43)          | 5 (38)                                       | 13 (59)                               | 18 (50)                                      | 23 (34)                                       | 7 (41)                                   |
| 21 Wk NSAID use                | 65 (42)          | 7 (54)                                       | 9 (41)                                | 15 (42)                                      | 26 (39)                                       | 8 (47)                                   |
| Baseline opioid use            | 57 (37)          | 6 (46)                                       | 10 (45)                               | 15 (42)                                      | 22 (35)                                       | 4 (24)                                   |
| 9 Wk opioid use                | 40 (26)          | 3 (23)                                       | 9 (41)                                | 10 (28)                                      | 18 (29)                                       | 4 (24)                                   |
| 21 Wk opioid use               | 52 (34)          | 7 (54)                                       | 10 (45)                               | 10 (28)                                      | 21 (34)                                       | 4 (24)                                   |
| Baseline Other Pain Medication | 67 (43)          | 8 (62)                                       | 7 (32)                                | 10 (28)                                      | 34 (51)                                       | 8 (47)                                   |
| 9 Wk Other Pain Medication     | 59 (38)          | 7 (54)                                       | 5 (23)                                | 14 (39)                                      | 28 (42)                                       | 5 (29)                                   |
| 21 Wk Other Pain Medication    | 58 (37)          | 8 (62)                                       | 4 (62)                                | 10 (28)                                      | 30 (45)                                       | 6 (35)                                   |

\*Continuous variables are summarized with mean (standard deviation)
